# Supplementary material
Source: PubMed Central journal article supplement (PMC3178840)
Supplement: NIHMS125599-supplement-01.pdf [file NIHMS125599-supplement-01.pdf]

## Inoue and Negishi Supplemental Figure 1

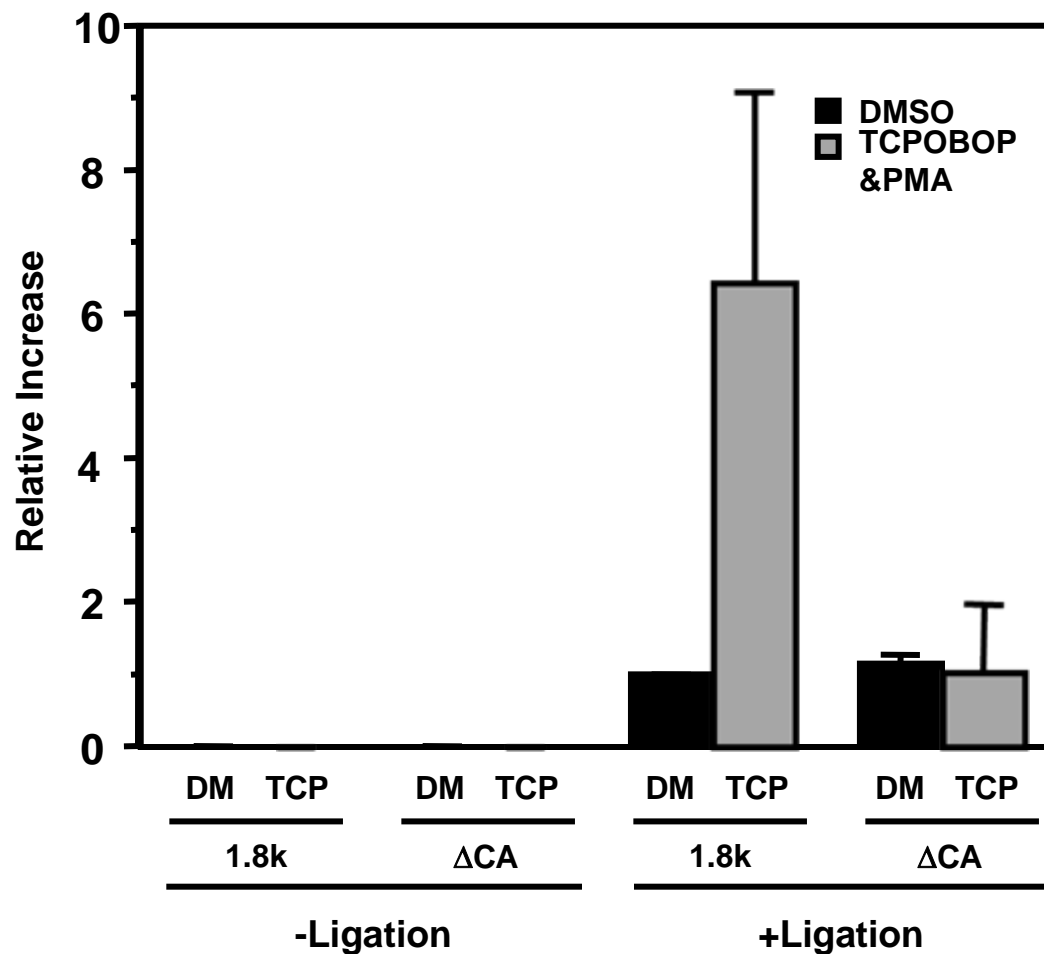

Supplemental Figure 1. Three 3C assays were independently performed as described in the Materials Methods section. The relative increases of PCR product and the SD values are calculated by normalizing the PCR value of each DMSO treatment to one.
